# Supplementary material for: Ficus septica plant extracts for treating Dengue virus in vitro
Source: PeerJ. 2017 Jun 8;5:e3448. doi: 10.7717/peerj.3448 (PMC5466810; doi:10.7717/peerj.3448)
Supplement: Supplemental Information 3 [file peerj-05-3448-s003.xlsx]

## Sheet: raw data
		raw data
	A549 cell
		ug/ml	exp.1	exp.2	exp.3	exp.4	exp.5	exp.6
	DENV1	3.125	10470.9	9163.5	8685.49	18095.8	13985.8	13759.4
		6.25	11154.4	8729	8870.24	15267.2	13501.2	11716.5
		12.5	9827.7	8563.31	8006.45	10724.9	10419.3	9383.71
		25	9266.65	7079.98	6994.26	5226.87	5759.45	4578.62
		50	1763.92	1566.97	1507	1161.24	1324.25	1122.74
		ctrl.	8619.37	9929.12	8984.5	14629.7	13544.7	12489.3
		ug/ml	exp.1	exp.2	exp.3	exp.4	exp.5	exp.6
	DENV2	3.125	7072.44	6882.4	7160.95	12444.5	12731.3	9998.23
		6.25	5992.96	6015.2	5295.73	12326.9	9231.39	10952
		12.5	6306.7	1969.91	1979.14	6698.81	6789.45	8709.85
		25	2879.71	1622.29	1237.07	2124.77	4829.92	1606.07
		50	529.941	251.355	305.272	1360.78	1662.54	763.06
		ctrl.	6203.72	4681.21	6201.9	10562.9	12185.9	9709.67
		ug/ml	exp.1	exp.2	exp.3	exp.4	exp.5	exp.6
	Aiv	3.125	6613.91	7256.9	8869.72	12011.7	13095.3	11577.4
		6.25	5833.58	7215.33	8232.89	11479.5	11903.5	11151.5
		12.5	5556.57	6501.33	6532	11140.5	11339.3	12558
		25	4744.23	5014.64	6953.97	10770.6	11415.7	12427.7
		50	4706.93	4777.63	7032.71	9332.04	10318.4	10080.6
		ctrl.	5515.15	7143.45	8715.89	11504.8	10763.3	13956.2
	Huh7
		ug/ml	exp.1	exp.2	exp.3	exp.4	exp.5	exp.6
	DENV1	3.125	20874.3	14825.7	11953.2	21392.7	16780	13850.1
		6.25	17339.8	14720.3	11049	18776.1	15613.7	13273.1
		12.5	16743.3	15031.3	10447.9	16667.2	16059.4	15231.3
		25	18244.2	15531.1	9296.38	16374.8	14778	14116.6
		50	937.62	837.524	865.729	8675.24	11128.6	10459.6
		ctrl.	15662.6	16242.1	11239.4	19383.2	17300.8	14906.8
		ug/ml	exp.1	exp.2	exp.3	exp.4	exp.5	exp.6
	DENV2	3.125	10484.9	9000.27	9120.86	13895.2	9157.47	8781.34
		6.25	8315.27	7327.57	6500.34	13707.4	11595.9	10591.3
		12.5	3288.16	5085.6	4484.44	10724.1	8697.11	8730.05
		25	1855.84	2271.28	3971.92	7954.98	6084.67	4787.31
		50	294.097	271.255	193.293	1368.73	1207.82	719.537
		ctrl.	5928.92	6108.31	7093.82	13287.7	10444.8	11191.5
		ug/ml	exp.1	exp.2	exp.3	exp.4	exp.5	exp.6
	Aiv	3.125	2880.24	3453.04	3460.95	2265.15	2192.83	2635.28
		6.25	2841.55	3307.18	3281.84	2113.85	2016.61	2274.1
		12.5	2420.07	2551.49	3169.09	2068.62	2081.91	2149.09
		25	2222.29	2566.15	2831.58	1808.75	2212.76	2342.39
		50	1695.7	1666.77	2032.01	1446.24	1857.08	2308.03
		ctrl.	2970.78	2804.58	3118.83	2071.51	2128.2	2515.35
	WS1
		ug/ml	exp.1	exp.2	exp.3	exp.4	exp.5	exp.6
	DENV1	3.125	15578.9	11478.5	8516.91	3743.87	4565.62	4319.23
		6.25	12212.1	9793.96	7790.22	3564.42	3028.13	2256.29
		12.5	8858.96	6813.15	5936.89	3798.93	2347.01	2261.25
		25	1240.61	1636.04	1212.82	849.568	735.204	851.523
		50	232.516	208.876	197.565	227.328	196.418	229.489
		ctrl.	11346.3	9980.43	9369.84	5312.15	5046.35	3361.67
		ug/ml	exp.1	exp.2	exp.3	exp.4	exp.5	exp.6
	DENV2	3.125	4697.19	4404.42	4537.14	2645.45	2268.51	3272.1
		6.25	3606.48	4363.65	2864	1626.28	2273.13	2306.07
		12.5	1971.01	2113.67	1859.79	1211.04	823.056	579.329
		25	494.961	416.569	466.673	410.343	357.527	258.326
		50	167.302	139.724	146.169	168.675	175.513	158.429
		ctrl.	4921.88	5038.47	4277.98	2654.45	2126.51	1925.34
		ug/ml	exp.1	exp.2	exp.3	exp.4	exp.5	exp.6
	Aiv	3.125	2328.79	2474.08	2172.62	1251.21	1133.69	1226.72
		6.25	2029.22	2090.52	2091.86	1200.04	1071.84	1257.9
		12.5	1852.03	2168.79	2037.85	842.501	946.31	1191.17
		25	1759	1889.96	2053.67	795.305	756.187	847.733
		50	1113.77	972.1	890.172	1194.86	745.396	735.865
		ctrl.	2297.85	2606.97	2383.46	1908.34	1333.41	1118.95
	HepG2
		ug/ml	exp.1	exp.2	exp.3	exp.4	exp.5	exp.6
	DENV1	3.125	6787.49	7193.25	6781.08	2574.91	8772.1	7312.01
		6.25	3574.44	7339.28	6148.49	7209.83	8128.26	6904.35
		12.5	5107.17	5752.58	4103.31	5629.52	5974.79	5859.91
		25	1857.66	2077.05	1995.92	3048.4	3800.72	3215.65
		50	1072.82	779.64	758.826	1159.79	1301.85	1133.26
		ctrl.	9716.63	10784.4	8403.95	12626.2	11596.6	10691.5
		ug/ml	exp.1	exp.2	exp.3	exp.4	exp.5	exp.6
	DENV2	3.125	3653.96	5058.84	3655.77	3959.12	4432.94	2539.85
		6.25	3403.3	2697.36	3028.89	4552.48	3270.83	2936
		12.5	2186.09	2106.35	1698.31	2563.73	2679.61	2353.9
		25	943.598	1098.38	852.649	1615.93	1490.05	1262.92
		50	637.892	650.408	556.35	863.556	829.133	918.845
		ctrl.	3550.13	4855.64	3241.57	5375.67	5345.39	4260.2
		ug/ml	exp.1	exp.2	exp.3	exp.4	exp.5	exp.6
	Aiv	3.125	3363.1	3434.8	3221.75	3579.53	3299.81	3408.32
		6.25	3801.32	4163.26	3364.5	3814.74	4047.63	4359.49
		12.5	3852.65	3394.74	3950.99	3065.24	3594.41	3372.54
		25	3214.63	3715.81	3717.19	3021.23	3332.23	3921.31
		50	3096.54	3243.14	3226.99	2777.72	3422.07	3737.96
		ctrl.	3958.75	4100.07	4246.08	4198.95	3526.46	3545.48

## Sheet: Background reduction
		Background reduction
	A549 cell
		ug/ml	exp.1	exp.2	exp.3	exp.4	exp.5	exp.6
	DENV1	3.125	10339.5	9032.03	8554.02	17910.1	13800	13573.6
		6.25	11022.9	8597.53	8738.76	15081.4	13315.5	11530.8
		12.5	9696.23	8431.84	7874.98	10539.2	10233.6	9197.97
		25	9135.18	6948.51	6862.79	5041.14	5573.71	4392.89
		50	1632.45	1435.5	1375.53	975.501	1138.51	937.008
		ctrl.	8487.9	9797.65	8853.03	14444	13358.9	12303.6
		ug/ml	exp.1	exp.2	exp.3	exp.4	exp.5	exp.6
	DENV2	3.125	6940.97	6750.93	7029.48	12258.8	12545.5	9812.49
		6.25	5861.49	5883.73	5164.26	12141.2	9045.65	10766.2
		12.5	6175.23	1838.44	1847.67	6513.08	6603.71	8524.12
		25	2748.24	1490.82	1105.6	1939.03	4644.19	1420.34
		50	398.47	119.884	173.802	1175.04	1476.8	577.325
		ctrl.	6072.25	4549.74	6070.43	10377.2	12000.1	9523.93
		ug/ml	exp.1	exp.2	exp.3	exp.4	exp.5	exp.6
	Aiv	3.125	6482.44	7125.42	8738.25	11825.9	12909.6	11391.7
		6.25	5702.11	7083.86	8101.42	11293.8	11717.8	10965.7
		12.5	5425.1	6369.86	6400.53	10954.8	11153.5	12372.3
		25	4612.76	4883.17	6822.5	10584.9	11229.9	12241.9
		50	4575.46	4646.16	6901.24	9146.3	10132.6	9894.9
		ctrl.	5383.67	7011.98	8584.42	11319	10577.6	13770.4
	Huh7
		ug/ml	exp.1	exp.2	exp.3	exp.4	exp.5	exp.6
	DENV1	3.125	20750.2	14701.6	11829.1	21199	16586.4	13656.5
		6.25	17215.7	14596.1	10924.9	18582.5	15420	13079.5
		12.5	16619.2	14907.1	10323.8	16473.6	15865.8	15037.7
		25	18120.1	15407	9172.26	16181.2	14584.4	13922.9
		50	813.5	713.404	741.609	8481.61	10935	10266
		ctrl.	15538.5	16118	11115.3	19189.6	17107.2	14713.2
		ug/ml	exp.1	exp.2	exp.3	exp.4	exp.5	exp.6
	DENV2	3.125	10360.8	8876.15	8996.74	13701.6	8963.83	8587.71
		6.25	8191.15	7203.45	6376.22	13513.8	11402.3	10397.7
		12.5	3164.04	4961.48	4360.32	10530.5	8503.47	8536.42
		25	1731.72	2147.16	3847.8	7761.34	5891.04	4593.67
		50	169.977	147.135	69.1728	1175.1	1014.18	525.902
		ctrl.	5804.81	5984.19	6969.7	13094.1	10251.1	10997.8
		ug/ml	exp.1	exp.2	exp.3	exp.4	exp.5	exp.6
	Aiv	3.125	2756.12	3328.92	3336.83	2071.52	1999.2	2441.65
		6.25	2717.43	3183.06	3157.72	1920.21	1822.97	2080.46
		12.5	2295.95	2427.37	3044.97	1874.99	1888.28	1955.45
		25	2098.17	2442.03	2707.46	1615.11	2019.13	2148.75
		50	1571.58	1542.65	1907.89	1252.61	1663.44	2114.4
		ctrl.	2846.66	2680.46	2994.71	1877.87	1934.56	2321.71
	WS1
		ug/ml	exp.1	exp.2	exp.3	exp.4	exp.5	exp.6
	DENV1	3.125	15500	11399.6	8437.96	3562.46	4384.21	4137.81
		6.25	12133.2	9715.01	7711.27	3383.01	2846.72	2074.87
		12.5	8780.01	6734.21	5857.94	3617.51	2165.6	2079.83
		25	1161.66	1557.1	1133.87	668.153	553.79	670.109
		50	153.569	129.929	118.618	45.9137	15.0043	48.0746
		ctrl.	11267.4	9901.49	9290.89	5130.73	4864.93	3180.26
		ug/ml	exp.1	exp.2	exp.3	exp.4	exp.5	exp.6
	DENV2	3.125	4618.25	4325.47	4458.2	2464.04	2087.1	3090.68
		6.25	3527.54	4284.7	2785.05	1444.86	2091.72	2124.65
		12.5	1892.06	2034.72	1780.84	1029.63	641.642	397.915
		25	416.014	337.621	387.726	228.928	176.113	76.9117
		50	88.3552	60.7768	67.2216	-12.7393	-5.90144	-22.9853
		ctrl.	4842.93	4959.52	4199.03	2473.04	1945.1	1743.92
		ug/ml	exp.1	exp.2	exp.3	exp.4	exp.5	exp.6
	Aiv	3.125	2249.85	2395.14	2093.67	1069.8	952.277	1045.31
		6.25	1950.27	2011.57	2012.91	1018.63	890.423	1076.49
		12.5	1773.08	2089.84	1958.9	661.087	764.896	1009.75
		25	1680.05	1811.01	1974.73	613.891	574.772	666.318
		50	1034.82	893.153	811.225	1013.45	563.982	554.451
		ctrl.	2218.9	2528.02	2304.51	1726.93	1152	937.54
	HepG2
		ug/ml	exp.1	exp.2	exp.3	exp.4	exp.5	exp.6
	DENV1	3.125	6586.41	6992.17	6580	2391.02	8588.22	7128.12
		6.25	3373.36	7138.2	5947.41	7025.94	7944.38	6720.46
		12.5	4906.09	5551.5	3902.23	5445.64	5790.91	5676.03
		25	1656.58	1875.97	1794.84	2864.51	3616.83	3031.77
		50	871.741	578.561	557.746	975.903	1117.97	949.372
		ctrl.	9515.55	10583.3	8202.87	12442.3	11412.7	10507.6
		ug/ml	exp.1	exp.2	exp.3	exp.4	exp.5	exp.6
	DENV2	3.125	3452.88	4857.76	3454.69	3775.24	4249.05	2355.96
		6.25	3202.22	2496.28	2827.81	4368.59	3086.95	2752.11
		12.5	1985.01	1905.27	1497.23	2379.84	2495.72	2170.01
		25	742.518	897.304	651.569	1432.05	1306.17	1079.04
		50	436.812	449.328	355.27	679.67	645.247	734.96
		ctrl.	3349.05	4654.56	3040.49	5191.79	5161.51	4076.32
		ug/ml	exp.1	exp.2	exp.3	exp.4	exp.5	exp.6
	Aiv	3.125	3162.02	3233.72	3020.67	3395.65	3115.92	3224.44
		6.25	3600.24	3962.18	3163.42	3630.85	3863.75	4175.61
		12.5	3651.57	3193.66	3749.91	2881.35	3410.53	3188.65
		25	3013.55	3514.73	3516.11	2837.34	3148.35	3737.42
		50	2895.46	3042.06	3025.91	2593.84	3238.18	3554.07
		ctrl.	3757.67	3898.99	4045	4015.06	3342.58	3361.59

## Sheet: Statictics
		Statictics
	A549 cell
		ug/ml	exp.1	exp.2	exp.3	exp.4	exp.5	exp.6	averge (%)	sd	p-value (FS(L)-M vs. Ctrl)
	DENV1	3.125	121.814	92.1857	96.6225	123.997	103.302	110.322	108.041	13.067
		6.25	129.866	87.7509	98.7093	104.413	99.6746	93.719	102.356	14.625
		12.5	114.236	86.0598	88.9524	72.9658	76.6046	74.7584	85.5962	15.4243	*
		25	107.626	70.9201	77.5191	34.9012	41.7227	35.7041	61.3989	29.11	**
		50	19.2326	14.6515	15.5374	6.75368	8.52247	7.61572	12.0522	5.11228	***
		ctrl.	100	100	100	100	100	100	100	0
		IC50	46.5	30.9	30.3	19.5	21.3	19.5	28	10.4436
		ug/ml	exp.1	exp.2	exp.3	exp.4	exp.5	exp.6	averge (%)	sd
	DENV2	3.125	114.306	148.381	115.799	118.132	104.545	103.03	117.365	16.3964
		6.25	96.5291	129.32	85.0724	116.999	75.3796	113.044	102.724	20.5684
		12.5	101.696	40.4075	30.4373	62.7633	55.0304	89.5021	63.3061	27.6893	**
		25	45.259	32.7671	18.2129	18.6855	38.7012	14.9133	28.0898	12.5608	***
		50	6.56215	2.63496	2.86308	11.3233	12.3066	6.06184	6.95866	4.10073	***
		ctrl.	100	100	100	100	100	100	100	0
		IC50	24.3	12.3	10.4	15.5	15.8	18.4	16.1167	4.89711
		ug/ml	exp.1	exp.2	exp.3	exp.4	exp.5	exp.6	averge (%)	sd
	Aiv	3.125	120.409	101.618	101.792	104.478	122.046	82.7257	105.512	14.4541
		6.25	105.915	101.025	94.3735	99.7768	110.779	79.6325	98.5836	10.8326
		12.5	100.769	90.8424	74.5599	96.7821	105.445	89.8467	93.0409	10.8089
		25	85.6806	69.6404	79.4753	93.5141	106.167	88.9	87.2295	12.4323
		50	84.9877	66.2603	80.3926	80.8045	95.7931	71.8561	80.0157	10.2976
		ctrl.	100	100	100	100	100	100	100	0
		IC50	>50	>50	>50	>50	>50	>50
	Huh7
		ug/ml	exp.1	exp.2	exp.3	exp.4	exp.5	exp.6	averge (%)	sd
	DENV1	3.125	133.54	91.2122	106.422	110.472	96.9557	92.8182	105.237	15.8076
		6.25	110.794	90.5582	98.287	96.8363	90.1377	88.8963	95.9182	8.23641
		12.5	106.955	92.4876	92.8796	85.8463	92.7434	102.206	95.5196	7.65393
		25	116.614	95.5891	82.5195	84.3227	85.2527	94.629	93.1545	12.7436
		50	5.23539	4.42614	6.67199	44.199	63.9205	69.7742	32.3712	30.6984	***
		ctrl.	100	100	100	100	100	100	100	0
		IC50	45.1	35.4	32.4	46.3	>50	>50	39.8	6.93926
		ug/ml	exp.1	exp.2	exp.3	exp.4	exp.5	exp.6	averge (%)	sd
	DENV2	3.125	178.486	148.327	129.084	104.64	87.4424	78.0855	121.011	38.3463
		6.25	141.11	120.375	91.4849	103.205	111.229	94.543	110.324	18.462
		12.5	54.5072	82.9098	62.5612	80.4214	82.9516	77.6191	73.495	12.0261	**
		25	29.8326	35.8805	55.2075	59.2737	57.4672	41.7689	46.5717	12.4273	***
		50	2.92821	2.45872	0.99248	8.97428	9.89337	4.78187	5.00482	3.6496	***
		ctrl.	100	100	100	100	100	100	100	0
		IC50	16.1	21.1	21.1	26.4	26.4	20.7	21.9667	3.92003
		ug/ml	exp.1	exp.2	exp.3	exp.4	exp.5	exp.6	averge (%)	sd
	Aiv	3.125	96.8194	124.192	111.424	110.312	103.341	105.166	108.542	9.29769
		6.25	95.4605	118.751	105.443	102.255	94.2318	89.6089	100.958	10.4178
		12.5	80.6543	90.5579	101.678	99.8462	97.6074	84.2246	92.4281	8.68145
		25	73.7066	91.105	90.4081	86.0075	104.371	92.5503	89.6915	9.95258
		50	55.2079	57.5518	63.7086	66.7036	85.9855	91.0706	70.038	14.9914
		ctrl.	100	100	100	100	100	100	100	0
		IC50	>50	>50	>50	>50	>50	>50
	WS1
		FS-(L)-M
		ug/ml	exp.1	exp.2	exp.3	exp.4	exp.5	exp.6	averge (%)	sd
	DENV1	3.125	137.565	115.13	90.8197	69.4337	90.1186	130.109	105.529	26.3795
		6.25	107.684	98.1167	82.9982	65.9361	58.515	65.2422	79.7488	19.9019	*
		12.5	77.9243	68.0121	63.0504	70.5067	44.5144	65.3983	64.901	11.2249	***
		25	10.31	15.7259	12.2041	13.0226	11.3833	21.0709	13.9528	3.93971	***
		50	1.36296	1.31222	1.27671	0.894877	0.308416	1.51166	1.11114	0.443353	***
		ctrl.	100	100	100	100	100	100	100	0
		IC50	16.1	15.5	13.9	11.2	9.1	14.3	13.35	2.68608
		ug/ml	exp.1	exp.2	exp.3	exp.4	exp.5	exp.6	averge (%)	sd
	DENV2	3.125	95.3606	87.2155	106.172	99.636	107.3		99.1369	8.25776
		6.25	72.8389	86.3935	66.326	58.4245	107.538	121.832	85.5588	24.7689
		12.5	39.0685	41.0265	42.4107	41.6341	32.9876	22.8172	36.6574	7.58667	***
		25	8.59013	6.80754	9.23369	9.25696	9.05421	4.41026	7.89213	1.93907	***
		50	1.82442	1.22546	1.60088	-0.515128	-0.303401	-1.31802	0.419034	1.29878	***
		ctrl.	100	100	100	100	100	100	100	0
		IC50	9.9	11	10.1	9.1	12.1	11.9	10.6833	1.18729
		ug/ml	exp.1	exp.2	exp.3	exp.4	exp.5	exp.6	averge (%)	sd
	Aiv	3.125	101.395	94.7434	90.8509	61.948	82.6629	111.495	90.5158	17.0543
		6.25	87.8935	79.5708	87.3466	58.9849	77.2936	114.821	84.3183	18.2538	*
		12.5	79.908	82.6671	85.003	38.281	66.3972	107.703	76.6598	23.0571	*
		25	75.7155	71.6374	85.6897	35.5481	49.8934	71.0709	64.9258	18.5439	***
		50	46.6366	35.3301	35.2016	58.6848	48.9568	59.1389	47.3248	10.6076	***
		ctrl.	100	100	100	100	100	100	100	0
		IC50	48.9	38.1		>50	36.4	>50	41.1333	6.77963
	HepG2
		ug/ml	exp.1	exp.2	exp.3	exp.4	exp.5	exp.6	averge (%)	sd
	DENV1	3.125	69.2173	66.068	80.2157		75.2512	67.8376	71.718	5.87214	***
		6.25	35.451	67.4478	72.5039	56.4681	69.6098	63.9579	60.9064	13.6384	***
		12.5	51.5586	52.4553	47.5715	43.7671	50.7407	54.0181	50.0186	3.73889	***
		25	17.4092	17.7257	21.8807	23.0224	31.6912	28.853	23.4304	5.81398	***
		50	9.16122	5.46673	6.7994	7.84342	9.79579	9.03508	8.01694	1.64477	***
		ctrl.	100	100	100	100	100	100	100	0
		IC50	6.2	13.4	10.9	8.6	11.6	10.1	10.1333	2.49933
		ug/ml	exp.1	exp.2	exp.3	exp.4	exp.5	exp.6	averge (%)	sd
	DENV2	3.125	103.101	104.366	113.623	72.7155	82.3219	57.7963	88.9871	21.5623
		6.25	95.6158	53.6308	93.0051	84.1443	59.8071	67.5147	75.6196	17.7426	**
		12.5	59.2708	40.9336	49.2431	45.8386	48.3526	53.2347	49.4789	6.28627	***
		25	22.171	19.278	21.4297	27.583	25.3059	26.4709	23.7064	3.23667	***
		50	13.0429	9.65351	11.6846	13.0913	12.5011	18.03	13.0006	2.77449	***
		ctrl.	100	100	100	100	100	100	100	0
		IC50	15.4	9.6	12.1	12.3	10.3	13.7	12.2333	2.13885
		ug/ml	exp.1	exp.2	exp.3	exp.4	exp.5	exp.6	averge (%)	sd
	Aiv	3.125	84.1484	82.9374	74.6765	84.5728	93.2192	95.9201	85.9124	7.66217
		6.25	95.8105	101.621	78.2056	90.4308	115.592	124.215	100.979	16.7957
		12.5	97.1766	81.9097	92.7047	71.7636	102.033	94.8555	90.0738	11.1819
		25	80.1973	90.1446	86.9248	70.6675	94.1892	111.18	88.8839	13.6967
		50	77.0548	78.0217	74.8061	64.6027	96.8768	105.726	82.848	15.3273
		ctrl.	100	100	100	100	100	100	100	0
		IC50	>50	>50	>50	>50	>50	>50
